# Supplementary material for: A Rat Study to Evaluate the Protein Quality of Three Green Microalgal Species and the Impact of Mechanical Cell Wall Disruption
Source: PubMed Central journal article supplement (PMC7694116; doi:10.3390/foods9111531), 2020-10-24
Supplement: foods-09-01531-s001.pdf [file foods-09-01531-s001.pdf]

**Table S1.** Composition of experimental diets.

| <b>Ingredient<sup>#</sup></b>           | <b>Zero-protein</b> | <b>Casein</b> | <b>CV</b> | <b>CS</b> | <b>AO</b> | <b>CVMR</b> | <b>CSMR</b> | <b>AOMR</b> |
|-----------------------------------------|---------------------|---------------|-----------|-----------|-----------|-------------|-------------|-------------|
| <i>Ingredient (%)</i>                   |                     |               |           |           |           |             |             |             |
| Casein                                  | 0                   | 11.52         |           |           |           |             |             |             |
| CV                                      |                     |               | 18.69     |           |           |             |             |             |
| CS                                      |                     |               |           | 19.92     |           |             |             |             |
| AO                                      |                     |               |           |           | 24.81     |             |             |             |
| CVMR                                    |                     |               |           |           |           | 18.76       |             |             |
| CSMR                                    |                     |               |           |           |           |             | 20.08       |             |
| AOMR                                    |                     |               |           |           |           |             |             | 25.38       |
| Corn starch                             | 47.48               | 37.48         | 37.04     | 34.24     | 34.68     | 37.04       | 34.21       | 34.62       |
| Sucrose                                 | 35                  | 35            | 35        | 35        | 35        | 35          | 35          | 35          |
| Lard <sup>&amp;</sup>                   | 9                   | 9             | 4.25      | 4.78      | 3.54      | 4.23        | 4.74        | 3.42        |
| Sunflower oil <sup>δ</sup>              | 1                   | 1             | 1         | 1         | 1         | 1           | 1           | 1           |
| Cellulose                               | 2                   | 2             | 1.23      | 1.60      | 0.68      | 1.23        | 1.60        | 0.65        |
| Mineral mixture                         | 4                   | 3.63          | 3.01      | 3.04      | 3.03      | 3.01        | 3.04        | 3.01        |
| Vitamin mixture                         | 1                   | 1             | 1         | 1         | 1         | 1           | 1           | 1           |
| Choline bitartrate                      | 0.2                 | 0.2           | 0.2       | 0.2       | 0.2       | 0.2         | 0.2         | 0.2         |
| Titanium oxide                          | 0.3                 | 0.3           | 0.3       | 0.3       | 0.3       | 0.3         | 0.3         | 0.3         |
| <i>Nutrient density (calculated, %)</i> |                     |               |           |           |           |             |             |             |
| Energy (kcal/g)                         | 4.27                | 4.22          | 4.19      | 4.22      | 4.09      | 4.19        | 4.22        | 4.08        |
| Protein                                 | 0                   | 9.89          | 9.83      | 9.89      | 9.59      | 9.83        | 9.88        | 9.56        |
| Starch + sucrose                        | 82.50               | 71.67         | 71.25     | 71.70     | 69.52     | 71.22       | 71.64       | 69.30       |
| Fat                                     | 10.00               | 9.89          | 9.83      | 9.89      | 9.59      | 9.83        | 9.88        | 9.56        |
| Fiber                                   | 2.00                | 1.98          | 1.97      | 1.98      | 1.92      | 1.97        | 1.98        | 1.91        |

<sup>#</sup> The ingredients were purchased from Dyets Inc. (Bethlehem, PA, USA) unless specified. <sup>&</sup>Tenderflake® Pure Lard containing 0.1g protein /10 g Lard (Walmart, Charlottetown, PE, Canada). <sup>δ</sup>Sunflower oil was purchased from the Atlantic Superstore (Charlottetown, PE, Canada). CV, CS, and AO are *Chlorella vulgaris*/NRC isolate AB12-A-U-BBM, *Chlorella sorokiniana*/NRC isolate SMC-15M and *Acutodesmus obliquus*/NRC isolate SMC-6F, respectively. CVMR, CSMR, and AOMR are the mechanically cell-ruptured CV, CS, and AO, respectively.

**Table S2.** Amino acid composition of casein and six microalgae products<sup>1</sup>.

| AA (mg/g biomass)              | Casein | CV    | CS    | AO    | CVMR  | CSMR  | AOMR  |
|--------------------------------|--------|-------|-------|-------|-------|-------|-------|
| Asparagine + aspartic acid     | 60.08  | 35.09 | 37.38 | 30.71 | 35.48 | 37.99 | 27.04 |
| Glutamine + glutamic acid      | 191.34 | 42.24 | 45.93 | 35.16 | 39.41 | 45.39 | 29.27 |
| Serine                         | 51.65  | 18.19 | 18.25 | 20.70 | 18.99 | 18.23 | 19.05 |
| glycine                        | 15.56  | 20.80 | 23.00 | 19.22 | 22.46 | 23.86 | 18.93 |
| histidine                      | 20.11  | 6.33  | 7.44  | 4.32  | 6.52  | 7.20  | 3.55  |
| arginine                       | 32.27  | 31.41 | 26.94 | 17.81 | 32.06 | 28.66 | 15.61 |
| threonine                      | 36.22  | 15.34 | 19.20 | 17.94 | 16.20 | 18.41 | 17.37 |
| alanine                        | 25.28  | 30.09 | 30.34 | 28.50 | 32.27 | 30.98 | 28.26 |
| proline                        | 105.24 | 19.12 | 21.46 | 19.19 | 20.58 | 21.83 | 19.77 |
| $\alpha$ -amino-N-butyric acid | 0.14   | 0.36  | 0.47  | 0.73  | 0.31  | 0.51  | 0.61  |
| tyrosine                       | 46.92  | 15.83 | 15.83 | 12.94 | 15.78 | 16.17 | 11.40 |
| valine                         | 55.37  | 20.73 | 21.38 | 18.24 | 21.77 | 21.85 | 17.74 |
| methionine                     | 23.07  | 6.68  | 5.98  | 5.94  | 6.32  | 6.28  | 5.76  |
| isoleucine                     | 39.65  | 12.91 | 12.65 | 11.09 | 13.25 | 12.92 | 10.86 |
| Leucine                        | 74.63  | 32.84 | 30.51 | 26.14 | 33.75 | 30.64 | 25.33 |
| phenylalanine                  | 35.12  | 19.19 | 15.80 | 15.15 | 18.80 | 15.70 | 14.23 |
| Ornithine                      | 0.11   | 0.12  | 0.25  | 0.39  | 0.29  | 0.31  | 0.34  |
| lysine                         | 41.93  | 18.55 | 20.74 | 12.69 | 17.32 | 21.31 | 10.22 |
| cysteine                       | 2.21   | 3.64  | 3.91  | 4.15  | 2.89  | 4.16  | 3.92  |

|                                     |       |       |       |       |       |       |       |
|-------------------------------------|-------|-------|-------|-------|-------|-------|-------|
| tryptophan                          | 13.28 | 8.31  | 7.15  | 6.04  | 8.34  | 8.30  | 6.40  |
| $\Sigma$ AA                         | 870.2 | 358.9 | 364.9 | 312.5 | 364.1 | 371.0 | 290.5 |
| N x 6.25 <sup>2</sup>               | 868.5 | 535.0 | 502.1 | 403.4 | 533.3 | 497.8 | 394.6 |
| N x 6.25 - $\Sigma$ AA <sup>3</sup> | 0     | 176.1 | 137.2 | 90.9  | 169.4 | 126.8 | 104.1 |

---

<sup>1</sup>Results are the average of 2 analytical replicates. <sup>2</sup> N x 6.25 is the total crude protein estimated by measuring total nitrogen using a nitrogen elemental analyzer. <sup>3</sup> The value of N x 6.25 -  $\Sigma$ AA for casein is -1.7 that was considered the analytical error and set to 0.
